# Supplementary material for: Novel RP1 mutations and a recurrent BBS1 variant explain the co-existence of two distinct retinal phenotypes in the same pedigree
Source: PubMed Central journal article supplement (PMC4271491; doi:10.1186/s12863-014-0143-2), 2014-12-14
Supplement: 12863_2014_143_MOESM2_ESM.pdf [file 12863_2014_143_MOESM2_ESM.pdf]

## ADDITIONAL FILES

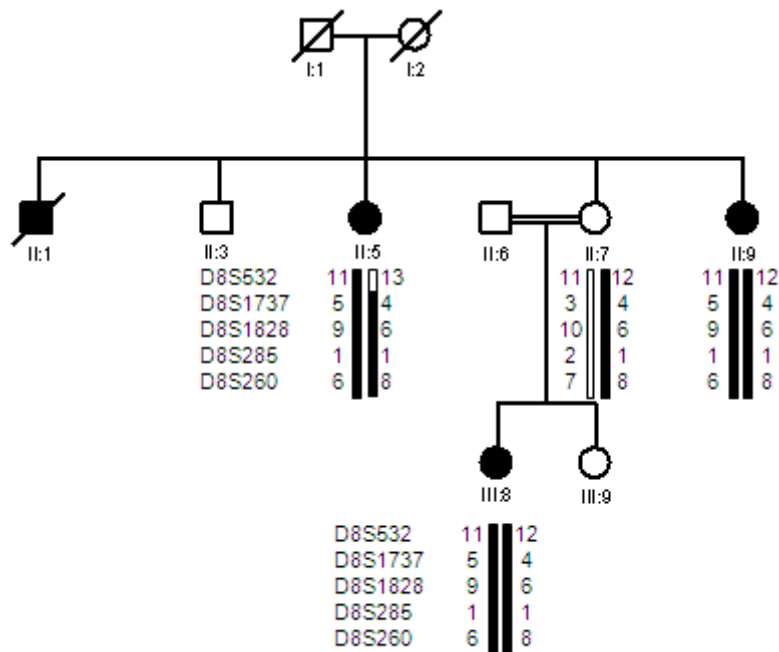

**Additional file 2. Haplotypes of available DNA samples of the arRP family branch using microsatellite markers flanking *RPI*.** The risk haplotype is shown in black, and alleles that do not cosegregate with RP are marked in white. Recombination events implicating the marker D8S532 were observed in patient II:5.
