# Supplementary material for: Novel RP1 mutations and a recurrent BBS1 variant explain the co-existence of two distinct retinal phenotypes in the same pedigree
Source: PubMed Central journal article supplement (PMC4271491; doi:10.1186/s12863-014-0143-2), 2014-12-14
Supplement: 12863_2014_143_MOESM3_ESM.pdf [file 12863_2014_143_MOESM3_ESM.pdf]

### ADDITIONAL FILES

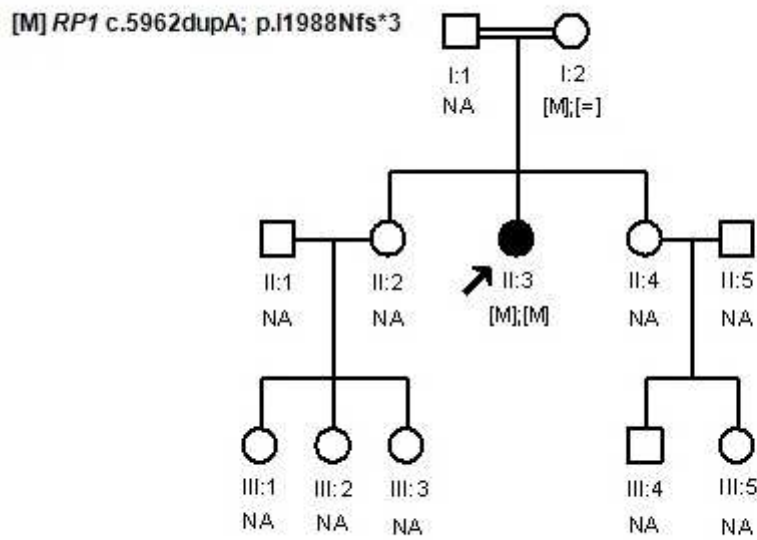

**Additional file 3.** Pedigree showing segregation of the mutation c.5962dupA of *RP1* in available family members. [M];[M]: Homozygous, [M];[=]: Heterozygous; NA: Not available.
